# Supplementary material for: Effects of Lean Interventions Supported by Digital Technologies on Healthcare Services: A Systematic Review
Source: Int J Environ Res Public Health. 2022 Jul 25;19(15):9018. doi: 10.3390/ijerph19159018 (PMC9330917; doi:10.3390/ijerph19159018)
Supplement: Supplementary file 1 [file ijerph-19-09018-s001.zip › ijerph-1809987-supplementary.pdf]

**Table S1. PRISMA Checklist**

| Section and Topic             | Item # | Checklist item                                                                                                                                                                                                                                                                                       | Location where item is reported |
|-------------------------------|--------|------------------------------------------------------------------------------------------------------------------------------------------------------------------------------------------------------------------------------------------------------------------------------------------------------|---------------------------------|
| <b>TITLE</b>                  |        |                                                                                                                                                                                                                                                                                                      |                                 |
| Title                         | 1      | Identify the report as a systematic review.                                                                                                                                                                                                                                                          | Title                           |
| <b>ABSTRACT</b>               |        |                                                                                                                                                                                                                                                                                                      |                                 |
| Abstract                      | 2      | See the PRISMA 2020 for Abstracts checklist (Background, Method, Results, and Discussion)                                                                                                                                                                                                            | Abstract                        |
| <b>INTRODUCTION</b>           |        |                                                                                                                                                                                                                                                                                                      |                                 |
| Rationale                     | 3      | Describe the rationale for the review in the context of existing knowledge.                                                                                                                                                                                                                          | Introduction                    |
| Objectives                    | 4      | Provide an explicit statement of the objective(s) or question(s) the review addresses.                                                                                                                                                                                                               | Introduction                    |
| <b>METHODS</b>                |        |                                                                                                                                                                                                                                                                                                      |                                 |
| Eligibility criteria          | 5      | Specify the inclusion and exclusion criteria for the review and how studies were grouped for the syntheses.                                                                                                                                                                                          | Methods                         |
| Information sources           | 6      | Specify all databases, registers, websites, organisations, reference lists and other sources searched or consulted to identify studies. Specify the date when each source was last searched or consulted.                                                                                            | Methods                         |
| Search strategy               | 7      | Present the full search strategies for all databases, registers and websites, including any filters and limits used.                                                                                                                                                                                 | Table S2                        |
| Selection process             | 8      | Specify the methods used to decide whether a study met the inclusion criteria of the review, including how many reviewers screened each record and each report retrieved, whether they worked independently, and if applicable, details of automation tools used in the process.                     | Methods                         |
| Data collection process       | 9      | Specify the methods used to collect data from reports, including how many reviewers collected data from each report, whether they worked independently, any processes for obtaining or confirming data from study investigators, and if applicable, details of automation tools used in the process. | Methods                         |
| Data items                    | 10a    | List and define all outcomes for which data were sought. Specify whether all results that were compatible with each outcome domain in each study were sought (e.g. for all measures, time points, analyses), and if not, the methods used to decide which results to collect.                        | Methods                         |
|                               | 10b    | List and define all other variables for which data were sought (e.g. participant and intervention characteristics, funding sources). Describe any assumptions made about any missing or unclear information.                                                                                         | Methods                         |
| Study risk of bias assessment | 11     | Specify the methods used to assess risk of bias in the included studies, including details of the tool(s) used, how many reviewers assessed each study and whether they worked independently, and if applicable, details of automation tools used in the process.                                    | Methods                         |
| Effect measures               | 12     | Specify for each outcome the effect measure(s) (e.g. risk ratio, mean difference) used in the synthesis or presentation of results.                                                                                                                                                                  | Methods and Results             |
| Synthesis methods             | 13a    | Describe the processes used to decide which studies were eligible for each synthesis (e.g. tabulating the study intervention characteristics and comparing against the planned groups for each synthesis (item #5)).                                                                                 | Methods                         |
|                               | 13b    | Describe any methods required to prepare the data for presentation or synthesis, such as handling of missing summary statistics, or data conversions.                                                                                                                                                | Methods                         |

| Section and Topic             | Item # | Checklist item                                                                                                                                                                                                                                                                       | Location where item is reported |
|-------------------------------|--------|--------------------------------------------------------------------------------------------------------------------------------------------------------------------------------------------------------------------------------------------------------------------------------------|---------------------------------|
|                               | 13c    | Describe any methods used to tabulate or visually display results of individual studies and syntheses.                                                                                                                                                                               | Methods                         |
|                               | 13d    | Describe any methods used to synthesize results and provide a rationale for the choice(s). If meta-analysis was performed, describe the model(s), method(s) to identify the presence and extent of statistical heterogeneity, and software package(s) used.                          | Methods                         |
|                               | 13e    | Describe any methods used to explore possible causes of heterogeneity among study results (e.g. subgroup analysis, meta-regression).                                                                                                                                                 | Not applicable                  |
|                               | 13f    | Describe any sensitivity analyses conducted to assess robustness of the synthesized results.                                                                                                                                                                                         | Not applicable                  |
| Reporting bias assessment     | 14     | Describe any methods used to assess risk of bias due to missing results in a synthesis (arising from reporting biases).                                                                                                                                                              | Methods                         |
| Certainty assessment          | 15     | Describe any methods used to assess certainty (or confidence) in the body of evidence for an outcome.                                                                                                                                                                                | Not applicable                  |
| <b>RESULTS</b>                |        |                                                                                                                                                                                                                                                                                      |                                 |
| Study selection               | 16a    | Describe the results of the search and selection process, from the number of records identified in the search to the number of studies included in the review, ideally using a flow diagram.                                                                                         | Results                         |
|                               | 16b    | Cite studies that might appear to meet the inclusion criteria, but which were excluded, and explain why they were excluded.                                                                                                                                                          | Results and Discussion          |
| Study characteristics         | 17     | Cite each included study and present its characteristics.                                                                                                                                                                                                                            | Results                         |
| Risk of bias in studies       | 18     | Present assessments of risk of bias for each included study.                                                                                                                                                                                                                         | Table S4                        |
| Results of individual studies | 19     | For all outcomes, present, for each study: (a) summary statistics for each group (where appropriate) and (b) an effect estimate and its precision (e.g. confidence/credible interval), ideally using structured tables or plots.                                                     | Tables 1-5                      |
| Results of syntheses          | 20a    | For each synthesis, briefly summarise the characteristics and risk of bias among contributing studies.                                                                                                                                                                               | Results                         |
|                               | 20b    | Present results of all statistical syntheses conducted. If meta-analysis was done, present for each the summary estimate and its precision (e.g. confidence/credible interval) and measures of statistical heterogeneity. If comparing groups, describe the direction of the effect. | Not applicable                  |
|                               | 20c    | Present results of all investigations of possible causes of heterogeneity among study results.                                                                                                                                                                                       | Discussion                      |
|                               | 20d    | Present results of all sensitivity analyses conducted to assess the robustness of the synthesized results.                                                                                                                                                                           | Not applicable                  |
| Reporting biases              | 21     | Present assessments of risk of bias due to missing results (arising from reporting biases) for each synthesis assessed.                                                                                                                                                              | Not applicable                  |
| Certainty of evidence         | 22     | Present assessments of certainty (or confidence) in the body of evidence for each outcome assessed.                                                                                                                                                                                  | Not applicable                  |
| <b>DISCUSSION</b>             |        |                                                                                                                                                                                                                                                                                      |                                 |
| Discussion                    | 23a    | Provide a general interpretation of the results in the context of other evidence.                                                                                                                                                                                                    | Discussion                      |
|                               | 23b    | Discuss any limitations of the evidence included in the review.                                                                                                                                                                                                                      | Discussion                      |
|                               | 23c    | Discuss any limitations of the review processes used.                                                                                                                                                                                                                                | Discussion                      |
|                               | 23d    | Discuss implications of the results for practice, policy, and future research.                                                                                                                                                                                                       | Discussion                      |

| Section and Topic                              | Item # | Checklist item                                                                                                                                                                                                                             | Location where item is reported |
|------------------------------------------------|--------|--------------------------------------------------------------------------------------------------------------------------------------------------------------------------------------------------------------------------------------------|---------------------------------|
| <b>OTHER INFORMATION</b>                       |        |                                                                                                                                                                                                                                            |                                 |
| Registration and protocol                      | 24a    | Provide registration information for the review, including register name and registration number, or state that the review was not registered.                                                                                             | Methods                         |
|                                                | 24b    | Indicate where the review protocol can be accessed, or state that a protocol was not prepared.                                                                                                                                             | Methods                         |
|                                                | 24c    | Describe and explain any amendments to information provided at registration or in the protocol.                                                                                                                                            | Not applicable                  |
| Support                                        | 25     | Describe sources of financial or non-financial support for the review, and the role of the funders or sponsors in the review.                                                                                                              | Not applicable                  |
| Competing interests                            | 26     | Declare any competing interests of review authors.                                                                                                                                                                                         | Conclusions                     |
| Availability of data, code and other materials | 27     | Report which of the following are publicly available and where they can be found: template data collection forms; data extracted from included studies; data used for all analyses; analytic code; any other materials used in the review. | Table S3                        |

From: Page MJ, McKenzie JE, Bossuyt PM, Boutron I, Hoffmann TC, Mulrow CD, et al. The PRISMA 2020 statement: an updated guideline for reporting systematic reviews. *BMJ* 2021;372:n71. doi: 10.1136/bmj.n71

For more information, visit: <http://www.prisma-statement.org/>

**Table S2. Search Strategy**

**PubMed-Medline**

(Total Quality Management[MH] OR Lean Healthcare[TW] OR Lean Method\*[TW] OR Lean Philosophy[TW] OR Lean Management[TW] OR Lean six sigma\*[TW] OR Toyota Production System\*[TW] OR Six sigma) AND (Information technolog\*[TW] OR Communication technolog\*[TW] OR Healthcare technolog\*[TW] OR Healthcare 4.0[TW] OR H4.0[TW] OR Ehealth[TW] OR Health information system\*[TW] OR Smart Technolog\*[TW] OR Telemedicine[TW] OR Internet of things[TW] OR Big Data[TW] OR Cloud computing[TW] OR Fog computing[TW] OR Mobile Computing[TW] OR Remote Sens\*[TW] OR Robot\*[TW] OR Artificial intelligence[TW] OR 3D print\*[TW] OR Virtual reality[TW] OR Augmented reality[TW] OR Automat\*[TW] OR Simulat\*[TW] OR Open source software[TW] OR Blockchain[TW] OR Electronic medical record\*[TW] OR Electronic health record\*[TW]) AND (Length of Stay[TW] OR LOS OR Turnover Time[TW] OR TOT OR Turnaround Time[TW] OR TAT OR Boarding Time[TW] OR Wait\* Time[TW] OR Patient Left Without Being Seen[TW] OR LWBS)

**Cochrane Library-CENTRAL**

- 1 [mh Total Quality Management]
- 2 (Lean near Healthcare) OR (Lean near Method\*) OR (Lean near Philosophy) OR (Lean near Management) OR (Lean near six sigma\*) OR (Toyota Production System\*) OR (Six near sigma)
- 3 #1 OR #2
- 4 (Information near technolog\*) OR (Communication near technolog\*) OR (Healthcare near technolog\*) OR (Healthcare near 4.0) OR (H4.0) OR (Ehealth) OR (Health near information near system\*) OR (Smart near Technolog\*) OR (Telemedicine) OR (Internet near of near thing\*) OR (Big near Data) OR (Cloud near computing) OR (Fog near computing) OR (Mobile near Computing) OR (Remote near Sens\*) OR (Robot\*) OR (Artificial near intelligence) OR (3D near print\*) OR (Virtual near reality) OR (Augmented near reality) OR (Automat\*) OR (Simulat\*) OR (Open near source near software) OR (Blockchain) OR (Electronic near medical near record\*) OR (Electronic near health near record\*)
- 5 (Length near Stay) OR (LOS) OR (Turnover near Time) OR (TOT) OR (Turnaround near time) OR (TAT) OR (Boarding near Time) OR (Wait\* near Time) OR (Patient near Left near Without near Being near Seen) OR (LWBS)
- 6 {AND #3-#5}

**Ebsco-Host / CINAHL**

Total Quality Management OR Lean Healthcare OR Lean Method\* OR Lean Philosophy OR Lean Management OR Lean six sigma\* OR Toyota Production System\* OR Six sigma

AND

Information technolog\* OR Communication technolog\* OR Healthcare technolog\* OR Healthcare 4.0 OR H4.0 OR Ehealth OR Health information system\* OR Smart Technolog\* OR Telemedicine OR Internet of things OR Big Data OR Cloud computing OR Fog computing OR Mobile Computing OR Remote Sens\* OR Robot\* OR Artificial intelligence OR 3D print\* OR Virtual reality OR Augmented reality OR Automat\* OR Simulat\* OR Open source software OR Blockchain OR Electronic medical record\* OR Electronic health record\*

AND

Length of Stay OR LOS OR Turnover Time OR TOT OR Turnaround Time OR TAT OR Boarding Time OR Wait\* Time OR Patient Left Without Being Seen OR LWBS

AND

Hospital OR Healthcare OR Health care OR Clinic\* OR Health OR Medic\*

AND

Lean Six Sigma

**Web of Science**

Total Quality Management OR Lean Healthcare OR Lean Method\* OR Lean Philosophy OR Lean Management OR Lean six sigma\* OR Toyota Production System\* OR Six sigma

AND

Information technolog\* OR Communication technolog\* OR Healthcare technolog\* OR Healthcare 4.0 OR H4.0 OR Ehealth OR Health information system\* OR Smart Technolog\* OR Telemedicine OR Internet of things OR Big Data OR Cloud computing OR Fog computing OR Mobile Computing OR Remote Sens\* OR Robot\* OR Artificial intelligence OR 3D print\* OR Virtual reality OR Augmented reality OR Automat\* OR Simulat\* OR Open source software OR Blockchain OR Electronic medical record\* OR Electronic health record\*

AND

Length of Stay OR LOS OR Turnover Time OR TOT OR Turnaround Time OR TAT OR Boarding Time OR Wait\* Time OR Patient Left Without Being Seen OR LWBS

AND

Hospital OR Healthcare OR Health care OR Clinic\* OR Health OR Medic\*

**Table S3.** Extended summary of findings

| First Author, Year, Country                  | Setting; Study Design; n; Time Frame                                      | Main Intervention                                                                                                                                                                         | Outcomes                                                      | Summary of findings                        |
|----------------------------------------------|---------------------------------------------------------------------------|-------------------------------------------------------------------------------------------------------------------------------------------------------------------------------------------|---------------------------------------------------------------|--------------------------------------------|
| (Amati et al., 2022)<br>Switzerland          | Operating room;<br>Case study, pre-post;<br>9 months                      | Lean and simulation                                                                                                                                                                       | Mean changeover time for gynecological surgery (skin-to skin) | Reduced from 58 min to 41 min              |
|                                              |                                                                           |                                                                                                                                                                                           | Mean changeover time for general surgery (skin-to skin)       | Reduced from 63 min to 48 min              |
|                                              |                                                                           |                                                                                                                                                                                           | Potential savings                                             | 1500 CHF per room per day                  |
| Tsai et al., 2021)Taiwan                     | Operating room;<br>Case study, pre-post;<br>n=2,964; 24 months            | Lean six sigma, electronic tracking system including electronic tags, registration APP for positioning and directions, QR-codes, perioperative flow system, and Health Information System | Mean LOS (orthopedy surgery)                                  | Reduced from 3.31 days to 1.57 days        |
|                                              |                                                                           |                                                                                                                                                                                           | Mean LOS (colon and rectal surgery)                           | Reduced from 2.49 days to 1.16 days        |
|                                              |                                                                           |                                                                                                                                                                                           | Mean LOS (urology surgery)                                    | Reduced from 3.31 days to 1.57 days        |
|                                              |                                                                           |                                                                                                                                                                                           | Mean LOS (otorhinolaryngology division)                       | Reduced from 2.49 days to 1.16 days        |
|                                              |                                                                           |                                                                                                                                                                                           | Hospitalization cycle time                                    | Reduced from 96 min to 73 min              |
|                                              |                                                                           |                                                                                                                                                                                           | Mean Non-Value-Added time                                     | Reduced from 62 min to 42 min              |
|                                              |                                                                           |                                                                                                                                                                                           | Percentage of Process Cycle Efficiency                        | Increased from 35.42% to 42.47%            |
|                                              |                                                                           |                                                                                                                                                                                           | Mean Patient satisfaction                                     | Increased from 4.29 to 4.40 (p<0.05)       |
| (Wongkrajang et al., 2020)<br>Thailand       | Laboratory; Case study, pre-post; n=30,180; 3 months                      | Lean and automation                                                                                                                                                                       | 90 <sup>th</sup> percentile Turnaround time                   | Reduced from 60 min to 50 min (p=0.01)     |
| (Ortiz-Barrios & Alfaro-Saiz, 2020) Colombia | ED; case study; n=16,741; 15 months                                       | Lean, simulation and virtual modelling                                                                                                                                                    | Mean waiting time                                             | Reduced from 201.6 min to 103.1 min        |
| (Ankrum et al., 2019) USA                    | Pediatric facility; case study, pre-post; n=47 room turnovers; 60 days    | Lean, robotics, and electronic medical records                                                                                                                                            | Median room turnover time                                     | Reduced from 130 min to 65 min (p<0.0001)  |
|                                              |                                                                           |                                                                                                                                                                                           | Median time between room breakdown to cleaning start time     | Reduced from 10 min to 3 min (p<0.004)     |
| (Recht et al., 2019) USA                     | MRI; case study, control vs intervention; n1=5,461 and n2=9,221; 6 months | Lean and automation of MRI (software tool)                                                                                                                                                | Mean turnaround time (patients ready for scanning)            | Reduced from 328 min to 132 min (p<0.0001) |
|                                              |                                                                           |                                                                                                                                                                                           | Mean turnaround time (all patients assessed)                  | Reduced from 537 min to 272 min (p<0.0001) |

|                                                 |                                                                          |                                                                                   |                                                                                                       |                                                         |
|-------------------------------------------------|--------------------------------------------------------------------------|-----------------------------------------------------------------------------------|-------------------------------------------------------------------------------------------------------|---------------------------------------------------------|
| (Baslyman et al., 2019) Saudi Arabia and Canada | Emergency room and lab; intervention (RTTS) vs control                   | Lean, real-time tracking sample or RTTS (RFID), and automated notification system | Patient satisfaction                                                                                  | Current=227 vs RTTS=663                                 |
|                                                 |                                                                          |                                                                                   | Emergency room satisfaction                                                                           | Current=25 vs RTTS=242                                  |
|                                                 |                                                                          |                                                                                   | Lab satisfaction                                                                                      | Current=0 vs RTTS=300                                   |
| (Shilpasree et al., 2019) India                 | Clinical laboratory; pre-post; n= 3,344; 2 months                        | Lean six sigma, automation, and computerization                                   | Turnaround time                                                                                       | Reduced from 110 min to 78.7 min (p<0.001)              |
| (Jensen et al., 2019) USA                       | Laboratory; pre-post; n= 21,639; 20 months; 4 months follow up           | Lean and automation (automated chemistry line and barcoding)                      | Specimen turnaround time                                                                              | TnT: reduced from 56.64 min to 53.68 min (p< 0.001)     |
|                                                 |                                                                          |                                                                                   |                                                                                                       | K+: reduced from 40.88 min to 39.82 min (p<0.001)       |
|                                                 |                                                                          |                                                                                   |                                                                                                       | CMP-Alb: reduced from 43.44 min to 40.51 min (p< 0.001) |
| (Garza-Reyes et al., 2019) Mexico               | Ambulance service; case study; n=850 ambulances; 1 month                 | Lean and simulation, internet-based technologies, and GPS tracking devices        | Average ambulance cycle time                                                                          | Reduced from 124.9 min to 75.8 min                      |
| (Brunsman, 2018) USA                            | Inpatient pharmacy, cohort study, (n=102), 15 months                     | Lean and automation of dispensing cabinet                                         | Median length of stay                                                                                 | Reduced from 22.9 days to 13.2 days (p=0.049)           |
|                                                 |                                                                          |                                                                                   | Median time from order to medication verification                                                     | Increased from 5.5 min to 10.5 min (p=0.11)             |
|                                                 |                                                                          |                                                                                   | Median overall turnaround time from CMS-approved antibiotic order entry to medication administration. | Reduced from 120 min to 80 min (p=0.014)                |
| (Baril et al., 2016) Canada                     | Hematology–oncology clinic; case study; 10 months, 2 months of follow up | Lean, simulation and business game-virtual environment                            | Mean patient waiting time before treatment                                                            | Reduced from 61 min to 16 min                           |
| (Bhat et al., 2016) India                       | Medical record department; case study; n=100; 2 months                   | Lean six sigma and simulation                                                     | Turnaround time of medical records preparation                                                        | Reduced from 19 min to 8 min                            |
|                                                 |                                                                          |                                                                                   | Potential savings                                                                                     | US \$20,000 annually                                    |
| (Rutman et al., 2015) USA                       | ED; pre-post; n=98; 7 months                                             | Lean, simulation and electronic medical records                                   | Median time to see a provider                                                                         | Reduced from 43 min to 7 min                            |
|                                                 |                                                                          |                                                                                   | Patients seen within 30 min                                                                           | Increased from 33 to 93%                                |
|                                                 |                                                                          |                                                                                   | Mean LOS in ED                                                                                        | Reduced by 30 min                                       |
| (Bender et al., 2015) USA                       | Operating room; pre-post; n=25,903; 36 months                            | Lean six sigma and robots                                                         | On-time starts                                                                                        | Increased from 32 to 73%                                |
|                                                 |                                                                          |                                                                                   | Mean turnover time                                                                                    | Non-significant change from 43 min to 44 min            |

|                                 |                                                           |                                                                                    |                                                                     |                                                             |
|---------------------------------|-----------------------------------------------------------|------------------------------------------------------------------------------------|---------------------------------------------------------------------|-------------------------------------------------------------|
|                                 |                                                           |                                                                                    | Actual room utilization                                             | Improved from 56% to 68%                                    |
|                                 |                                                           |                                                                                    | Percentage of overtime                                              | Reduced from 7% to 4 %                                      |
| (Beck & Gosik, 2015) USA        | Inpatient pediatric service; pre-post; n=3,509; 12 months | Lean six sigma and tele-tracking systems                                           | Median time of patient discharge                                    | Reduced from 15:48 to 14:1 (p<0.0001)                       |
|                                 |                                                           |                                                                                    | Percentage of patients discharged by noon                           | Increased from 14% to 27% (p<0.0001)                        |
|                                 |                                                           |                                                                                    | Mean length of stay                                                 | Non-significant change, from 3.1 days to 3.0 days (p=0.864) |
|                                 |                                                           |                                                                                    | 30-day readmission rates                                            | Non-significant change, from 9.4% to 9.1% (p=0.703)         |
| (Lee et al., 2015) USA          | Emergency care center; n=18,726; 9 months                 | Process mapping, machine learning, simulation, and optimization                    | Overall LOS                                                         | Reduced from 10.59 h to 7.14 h                              |
|                                 |                                                           |                                                                                    | Percentage of patients LWBS                                         | Reduced by 30%                                              |
|                                 |                                                           |                                                                                    | Percentage of 30-day Readmission rate                               | Reduced by 30%                                              |
|                                 |                                                           |                                                                                    | ED costs reductions and savings in penalties (from 2008-2012)       | US \$29.1 million                                           |
| (Rico et al., 2015) USA         | ED; pre-post; n=50; 1 month                               | Lean and automated infusion system                                                 | Mean waiting time for FDG Infusion                                  | Reduced from 11.3 min to 6.4 min (p<0.01)                   |
| (Thureson, 2015) Sweden         | Histopathology lab; pre-post; n=46,675; 27 months         | Lean and automatic embedding console (digital pathology)                           | Median TAT for patients with breast cancer                          | Reduced from 25 days to 15.5 days (p<0.001)                 |
| (Lo et al., 2015) USA           | Pediatric emergency department; pre-post; 7 months        | Lean, real-time voice recognition system, simulation, electronic charting, and EHR | Discharged patients LOS                                             | Increased from 161 min to 168 min                           |
|                                 |                                                           |                                                                                    | Admitted patients LOS                                               | No changed (270 min)                                        |
| (Sanders & Karr, 2015) USA      | ED; Pre-post                                              | Lean six sigma and ED tracking boards                                              | Median TAT for ED specimens of complete blood count analysis (CBCA) | Reduced from 15 min to 11 min                               |
| (Wannemuehler et al., 2015) USA | OR; pre-post; n=644; 10 months                            | Lean six sigma and electronic tracking system                                      | Number of instruments for adenotonsillectomy sets                   | Reduced from 52 to 24 instruments                           |
|                                 |                                                           |                                                                                    | Median assembly times (instrument set)                              | Reduced from 8.4 min to 4.7 min (p<0.0001)                  |
|                                 |                                                           |                                                                                    | Mean Mayo setup times                                               | Reduced from 97.6 s to 76.1 s (p<0.0001)                    |
|                                 |                                                           |                                                                                    | Mean operative times                                                | No change from 1,773 s vs 1,631 s (p>0.05)                  |

|                                         |                                                                  |                                                                                      |                                                                                   |                                                                                                                                                        |
|-----------------------------------------|------------------------------------------------------------------|--------------------------------------------------------------------------------------|-----------------------------------------------------------------------------------|--------------------------------------------------------------------------------------------------------------------------------------------------------|
| (Tejedor-Panchon et al., 2014)<br>Spain | ED; Quasi-experimental pre-post study; n=256,628; 36 months      | Lean, simulation and digital technology in X-ray                                     | Mean LOS in ED (time spent in the examination area)                               | NUC, reduced from 80.4 min to 61.6 min (p<0.001); TC, reduced from 137.8 min to 123.8 min (p<0.05); MSC, reduced from 219.7 min to 209.3 min (p=0.108) |
|                                         |                                                                  |                                                                                      | Mean wait time to see a physician                                                 | Reduced from 58 min to 49.1 min (p<0.001)                                                                                                              |
|                                         |                                                                  |                                                                                      | Percentage of patients LWBS                                                       | Reduced, from 2.8% to 2.0% (p<0.001)                                                                                                                   |
| (White et al., 2014) USA                | ED; prospective controlled, pre-post study; n=59,687; 17 months. | Lean, six sigma, QT, TOC, electronic patient tracking system (EDIS)                  | Median LOS for discharged patients                                                | Intervention group reduced from 158 min to 143 min (p<0.0001)<br>No change in control group from 265 min to 267 min (p=0.69)                           |
|                                         |                                                                  |                                                                                      | Percentage of patients discharged within one hour                                 | Intervention group increased from 6.9% to 9.7%, (p<0.0001)<br>No change in control group from 2.9% to 2.9% (p=0.98)                                    |
|                                         |                                                                  |                                                                                      | Median exam room time                                                             | Intervention group reduced 34 min from 90 to 56 min, (p<0.0001)<br>Control group increased from 28min to 36 min (p<0.0001)                             |
| (Furterer, 2014), USA                   | ED; case study; 7 months                                         | Lean six sigma, automation, electronic ED bed board, and EMR                         | Mean LOS (all patients)                                                           | Reduced from 6.9 h to 4.7 h (p=0.000)                                                                                                                  |
|                                         |                                                                  |                                                                                      | Mean LOS (admitted patients)                                                      | Reduced from 8.7 h to 6.1 h                                                                                                                            |
|                                         |                                                                  |                                                                                      | Mean LOS (discharged patients)                                                    | Reduced from 5.8 h to 4.1 h                                                                                                                            |
|                                         |                                                                  |                                                                                      | Percentage of patients LWBS                                                       | Reduced from 6.5 % to 0.34 %                                                                                                                           |
|                                         |                                                                  |                                                                                      | Patient satisfaction scores                                                       | Increased by 24% to 89.9 %                                                                                                                             |
|                                         |                                                                  |                                                                                      | Time from door to doctor                                                          | Reduced from 100 min to 27 min                                                                                                                         |
| (Burkitt et al., 2009) USA              | Department of surgery; cohort study; n=1,779; 48 months          | TPS, automatic control of antibiotics after surgery, and computerized medical record | Median LOS                                                                        | Non-significant change (p=0.90)                                                                                                                        |
|                                         |                                                                  |                                                                                      | Percentage of surgical admissions receiving appropriate perioperative antibiotics | Increased from 25.5% to 44% (p<0.01)                                                                                                                   |

|                                        |                                                        |                                                         |                                          |                                       |
|----------------------------------------|--------------------------------------------------------|---------------------------------------------------------|------------------------------------------|---------------------------------------|
| (Eller, 2009)<br>USA                   | ED; pre-post; 25 months;                               | Lean, patient track and electronic documentation system | Mean LOS for no RAD patients             | Reduction of 45 min                   |
|                                        |                                                        |                                                         | Mean LOS for RAD patients                | Reduction of 208 min                  |
|                                        |                                                        |                                                         | Percentage of patients LWBS              | Reduction of 28%                      |
| (Nelson-Peterson & Leppa, 2007)<br>USA | General hospital; time-series, pre-post; n=8; 5 months | Lean and simulation                                     | Staff walking distance                   | Reduced from 5,818 steps to 846 steps |
|                                        |                                                        |                                                         | Registered nurse lead time               | Reduced from 240 min to 126 min       |
|                                        |                                                        |                                                         | Setup time (minutes for 1 cycle of care) | Reduced from 20 min to 3 min          |

**Note.** CMP-Alb indicates complete metabolic panel-albumin; CMS, Centers for Medicare and Medicaid Services; ED, emergency department; EMR, Electronic medical records; EHR, Electronic health record; FDG, Fluorodeoxyglucose; GPS indicates global positioning system; h, hours; K+, Potassium; LOS, Length of stay; LWBS, left without being seen; MRI, Magnetic resonance imaging; MSC, medical-surgical cases; min, minutes; mo, months; NUC, non-urgent circuit; OR, Operating room; QT, Queuing theory; RAD, Rapid assessment and disposition process; TAT, Turnaround time; TC, trauma cases; TOC, Theory of constraints; TPS, Toyota production system; TnT, Troponin. The last name of the main author and the publication year are shown.

**Table S4. Risk of Bias**

|                      | Risk of bias domains |    |    |    |    |    |    | Overall |
|----------------------|----------------------|----|----|----|----|----|----|---------|
|                      | D1                   | D2 | D3 | D4 | D5 | D6 | D7 |         |
| Nelson-Peterson 2007 | -                    | +  | +  | +  | +  | +  | -  | -       |
| Eller, 2009          | -                    | -  | +  | +  | +  | +  | -  | -       |
| Burkitt, 2009        | -                    | +  | +  | +  | +  | -  | +  | -       |
| Furterer, 2014       | -                    | +  | +  | +  | +  | +  | +  | -       |
| White, 2014          | -                    | +  | +  | +  | +  | +  | +  | +       |
| Tejedor, 2014        | -                    | +  | +  | +  | +  | +  | -  | -       |
| Wannmuehlet, 2015    | -                    | +  | -  | +  | +  | +  | +  | -       |
| Sanders, 2015        | -                    | +  | +  | +  | -  | +  | +  | -       |
| Lo, 2015             | -                    | +  | +  | +  | -  | +  | +  | -       |
| Thureson, 2015       | -                    | +  | +  | +  | -  | +  | +  | -       |
| Rico, 2015           | -                    | +  | +  | +  | +  | -  | +  | -       |
| Lee, 2015            | -                    | +  | +  | +  | +  | -  | +  | -       |
| Beck, 2015           | +                    | +  | +  | +  | +  | +  | +  | +       |
| Bender, 2015         | -                    | +  | +  | +  | +  | -  | -  | ✗       |
| Rutman, 20           | -                    | -  | +  | +  | +  | +  | -  | -       |
| Bhat, 2016           | +                    | +  | +  | +  | +  | +  | +  | +       |
| Baril, 2016          | -                    | +  | +  | +  | -  | +  | +  | -       |
| Brunsmann, 2018      | +                    | -  | +  | +  | +  | +  | +  | +       |
| Baslyman, 2019       | -                    | -  | -  | +  | +  | -  | -  | ✗       |
| Garza, 2019          | -                    | +  | +  | +  | +  | +  | +  | -       |
| Jensen, 2019         | -                    | +  | +  | +  | +  | +  | +  | -       |
| Shilpasree, 2019     | -                    | +  | +  | +  | +  | +  | +  | -       |
| Recht, 2019          | -                    | +  | +  | +  | +  | +  | +  | -       |
| Ankrum, 2019         | -                    | +  | +  | +  | -  | +  | +  | -       |
| Ortiz, 2020          | -                    | +  | +  | +  | +  | -  | +  | -       |
| Wongkrajang, 2020    | -                    | -  | +  | +  | +  | +  | +  | -       |
| Tsai, 2021           | -                    | -  | +  | +  | +  | +  | +  | -       |
| Amati, 2022          | -                    | -  | +  | +  | +  | +  | +  | -       |

Domains:  
D1: Bias due to confounding.  
D2: Bias due to selection of participants.  
D3: Bias in classification of interventions.  
D4: Bias due to deviations from intended interventions.  
D5: Bias due to missing data.  
D6: Bias in measurement of outcomes.  
D7: Bias in selection of the reported result.

Judgement  
✗ Serious  
- Moderate  
+ Low
